# Supplementary material for: High Sensitivity of Circulating Tumor Cells Derived from a Colorectal Cancer Patient for Dual Inhibition with AKT and mTOR Inhibitors
Source: PubMed Central journal article supplement (PMC7566012; doi:10.3390/cells9092129), 2020-09-20
Supplement: cells-09-02129-s001.pdf [file cells-09-02129-s001.pdf]

Supplementary Material:

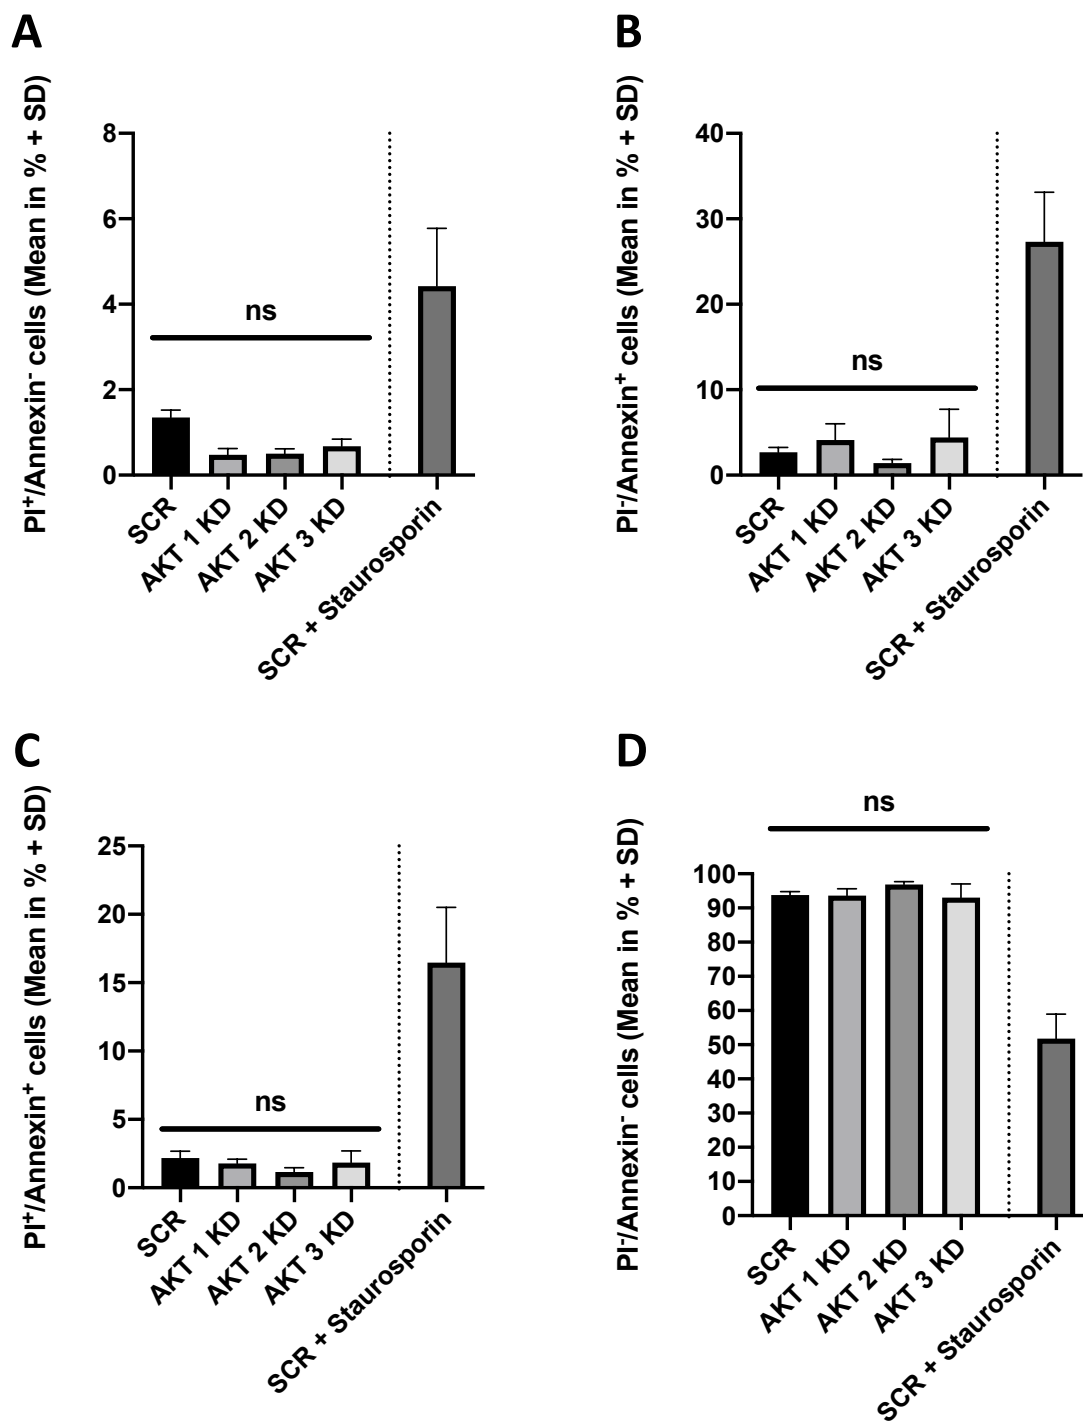

**Supplementary Figure S1.** Effect of AKT isoform specific knockdowns on apoptosis of CTC-MCC-41 cells. Stable isoform specific knockdowns of AKT and SCR control were subjected to FACS analysis. 2  $\mu$ M Staurosporin was used to induce apoptosis as a positive control in CTC-MCC-41 SCR cells. Cells were maintained for 48 hours and then stained with either propidium iodid (PI) (A), Annexin V (FITC) (B) or the combination of both agents (C). Unstained control can be found in (D). The cells were subjected to FACS analysis in biological quadruplicates. The cells were gated for single cells prior to analysis. p values were calculated using one-way ANOVA with Tukey's multiple comparisons test (ns  $p > 0.05$ ). The mean values (n = 4) with standard deviation are shown.

**Supplementary Table S1.** Primary and secondary antibodies used for western blot analysis.

| <b>Target</b>                           | <b>Manufacturer</b>          | <b>Clone /<br/>Reference<br/>number</b> | <b>Host species</b> | <b>Dilution</b> |
|-----------------------------------------|------------------------------|-----------------------------------------|---------------------|-----------------|
| AKT1                                    | Cell Signaling<br>Technology | C73H10, #2938                           | rabbit              | 1:1000          |
| AKT2                                    | Cell Signaling<br>Technology | 5B5, #2964                              | rabbit              | 1:1000          |
| AKT3                                    | Cell Signaling<br>Technology | 62A8, #3788                             | rabbit              | 1:1000          |
| Anti-mouse<br>IgG, HRP-<br>linked       | Cell Signaling<br>Technology | #7076                                   | horse               | 1:5000          |
| Anti-rabbit<br>IgG, HRP-<br>linked      | Cell Signaling<br>Technology | #7074                                   | goat                | 1:5000          |
| HSC70                                   | Santa Cruz<br>Biotechnology  | B-6, #sc-7298                           | mouse               | 1:1000          |
| p44/42 MAPK<br>(Erk1/2)                 | Cell Signaling<br>Technology | #9102                                   | rabbit              | 1:1000          |
| mTOR                                    | Cell Signaling<br>Technology | 7C10, #2983                             | rabbit              | 1:1000          |
| panAKT                                  | Cell Signaling<br>Technology | 11E7, #4685                             | rabbit              | 1:1000          |
| pAKT (S473)                             | Cell Signaling<br>Technology | D9E, #4060                              | rabbit              | 1:1000          |
| pmTOR<br>(S2448)                        | Cell Signaling<br>Technology | #2971                                   | rabbit              | 1:1000          |
| pp44/42 MAPK<br>(Erk1/2)<br>(T202/Y204) | Cell Signaling<br>Technology | #9101                                   | rabbit              | 1:1000          |
| pS6 ribosomal<br>protein<br>(S240/S244) | Cell Signaling<br>Technology | D68F8, #5364                            | rabbit              | 1:1000          |
| S6 ribosomal<br>protein                 | Cell Signaling<br>Technology | 5G10, #2217                             | rabbit              | 1:1000          |
